# Supplementary material for: Relationship of polymorphisms in the tissue inhibitor of metalloproteinase (TIMP)-1 and -2 genes with chronic heart failure
Source: PubMed Central journal article supplement (PMC6013444; doi:10.1038/s41598-018-27857-5), 2018-06-21
Supplement: 41598_2018_27857_MOESM1_ESM.pdf [file 41598_2018_27857_MOESM1_ESM.pdf]

**Relationship of polymorphisms in the tissue inhibitor of metalloproteinase (*TIMP*)-1 and -2 genes with chronic heart failure**

Evelise Regina Polina<sup>1</sup>, Raquel Rosa Candebat Vallejo Araújo<sup>1</sup>, Renan Cesar Sbruzzi<sup>1</sup>,  
Andréia Biolo<sup>2,3</sup>, Luís Eduardo Rohde<sup>2,3</sup>, Nadine Clausell<sup>2,3</sup> & Kátia Gonçalves dos Santos<sup>1,2,\*</sup>

<sup>1</sup>Laboratory of Human Molecular Genetics, Universidade Luterana do Brasil, Canoas, 92425-900, Brazil

<sup>2</sup>Heart Failure and Cardiac Transplant Unit, Cardiology Division, Hospital de Clínicas de Porto Alegre (HCPA), Porto Alegre, 90035-903, Brazil

<sup>3</sup>Department of Internal Medicine, Medical School, Universidade Federal do Rio Grande do Sul (UFRGS), Porto Alegre, 90040-341, Brazil

\*Corresponding author: kgsantos2010@gmail.com

**Supplementary Table S1.** Comparison of genotype and allele frequencies of the 372T>C polymorphism between heart failure patients with and without left bundle branch block (LBBB).

|           | <b>Without LBBB (n = 209)</b> | <b>With LBBB (n = 84)</b> | <b><i>P</i>*</b> |
|-----------|-------------------------------|---------------------------|------------------|
| Females   |                               |                           |                  |
| Genotype  | n = 63                        | n = 36                    |                  |
| TT, n (%) | 25 (39.7)                     | 14 (38.9)                 | 0.979            |
| TC, n (%) | 25 (39.7)                     | 15 (41.7)                 |                  |
| CC, n (%) | 13 (20.6)                     | 7 (19.4)                  |                  |
| Allele    | n = 126                       | n = 72                    |                  |
| T, n (%)  | 75 (59.5)                     | 43 (59.7)                 | >0.999           |
| C, n (%)  | 51 (40.5)                     | 29 (40.3)                 |                  |
| Males     |                               |                           |                  |
| T, n (%)  | 75 (51.4)                     | 33 (68.7)                 | 0.053            |
| C, n (%)  | 71 (48.6)                     | 15 (31.3)                 |                  |

\**P*-values were calculated using the Pearson chi-square test with Yates correction where appropriate. Left bundle branch block data were available for 293 patients (instead of 300).

**Supplementary Table S2.** Comparison of genotype and allele frequencies of the 372T>C polymorphism between white and non-white subjects stratified by clinical status.

|                 | <b>Blood donors (n = 304)</b> |                               |                  | <b>Heart failure patients (n = 300)</b> |                               |                  |
|-----------------|-------------------------------|-------------------------------|------------------|-----------------------------------------|-------------------------------|------------------|
|                 | <b>White<br/>(n = 238)</b>    | <b>Non-white<br/>(n = 66)</b> | <b><i>P</i>*</b> | <b>White<br/>(n = 214)</b>              | <b>Non-white<br/>(n = 86)</b> | <b><i>P</i>*</b> |
| <b>Females</b>  |                               |                               |                  |                                         |                               |                  |
| <b>Genotype</b> | n = 76                        | n = 17                        |                  | n = 74                                  | n = 25                        |                  |
| TT, n (%)       | 20 (26.3)                     | 6 (35.3)                      | 0.672            | 29 (39.2)                               | 10 (40.0)                     | 0.818            |
| TC, n (%)       | 40 (52.6)                     | 7 (41.2)                      |                  | 29 (39.2)                               | 11 (44.0)                     |                  |
| CC, n (%)       | 16 (21.1)                     | 4 (23.5)                      |                  | 16 (21.6)                               | 4 (16.0)                      |                  |
| <b>Allele</b>   | n = 152                       | n = 34                        |                  | n = 148                                 | n = 50                        |                  |
| T, n (%)        | 80 (52.6)                     | 19 (55.9)                     | 0.878            | 87 (58.8)                               | 31 (62.0)                     | 0.815            |
| C, n (%)        | 72 (47.4)                     | 15 (44.1)                     |                  | 61 (41.2)                               | 19 (38.0)                     |                  |
| <b>Males</b>    |                               |                               |                  |                                         |                               |                  |
| T, n (%)        | 87 (53.7)                     | 23 (46.9)                     | 0.504            | 83 (59.3)                               | 30 (49.2)                     | 0.241            |
| C, n (%)        | 75 (46.3)                     | 26 (53.1)                     |                  | 57 (40.7)                               | 31 (50.8)                     |                  |

\**P*-values were calculated using chi-square test with Yates correction where appropriate.
